# Supplementary material for: Novel deep-blue hot exciton material for high-efficiency nondoped organic light-emitting diodes
Source: Royal Society of Chemistry journal article supplement (doi:10.1039/d2tc00877g), 2022-01-01
Supplement: d2tc00877g1.pdf [file d2tc00877g1.pdf]

## Supporting Information

### Novel Deep Blue Hot Exciton Material for High-Efficiency Nondoped Organic Light-Emitting Diode

*Pei Xu,<sup>a</sup> Lei Xu,<sup>a</sup> Yuyu Pan,<sup>c</sup> Dezhi Yang,<sup>a</sup> Zetong Ma,<sup>a</sup> Xianfeng Qiao,<sup>a</sup> Dehua Hu,<sup>\*a,b</sup> Dongge Ma,<sup>a</sup> and Yuguang Ma<sup>\*a</sup>*

<sup>a</sup> State Key Laboratory of Luminescent Materials and Devices, South China University of Technology, Guangzhou, 510640, P. R. China

<sup>b</sup> School of Chemical Engineering and Light Industry, Guangdong University of Technology, Guangzhou 510006, China.

<sup>c</sup> Shenyang Univ Technol, Sch Petrochem Engn, 30 Guanghua St, Liaoyang 111003, P. R. China

E-mail: [msdhhu@scut.edu.cn](mailto:msdhhu@scut.edu.cn); [ygma@scut.edu.cn](mailto:ygma@scut.edu.cn)

## Contents

### S1. Synthesis General

### S2. Supplementary Thermal and Electrochemical Properties

### S3. Supplementary Theoretical Calculations

### S4. Supplementary Photophysical Properties

### S5. Supplementary Electroluminescence Performances

### S6. Supplementary Mechanism Study

## S1. Synthesis General

The  $^1\text{H}$  NMR spectra was recorded on a Bruker AVANCE 500 spectrometer at 500 MHz, using tetramethylsilane (TMS) as the internal standard and  $\text{CDCl}_3$  as the solvent. The matrix- assisted laser desorption ionization time-of-flight (MALDI-TOF) mass spectrum was measured using an AXIMA-CFRTM plus instrument.

$^1\text{H}$  NMR (500 MHz, Chloroform- $d$ )  $\delta$  8.04 (t,  $J = 1.7$  Hz, 1H), 7.93 (d,  $J = 6.5$  Hz, 2H), 7.91 - 7.86 (m, 2H), 7.78 - 7.70 (m, 6H), 7.66 - 7.61 (m, 2H), 7.59 - 7.53 (m, 2H), 7.47 (t,  $J = 7.6$  Hz, 4H), 7.42 - 7.35 (m, 6H).  $^{13}\text{C}$  NMR (101 MHz,  $\text{CDCl}_3$ )  $\delta$  143.48, 140.89, 139.67, 138.65, 136.93, 133.66, 131.30, 131.26, 128.81, 128.40, 127.88, 126.65, 126.28, 125.03, 124.77, 124.39, 124.22, 117.89, 110.62.

MALDI-TOF-MS ( $m/z$ ): calcd for  $\text{C}_{39}\text{H}_{25}\text{N}$ , 507.20; found, 507.28 [ $\text{M}^+$ ].

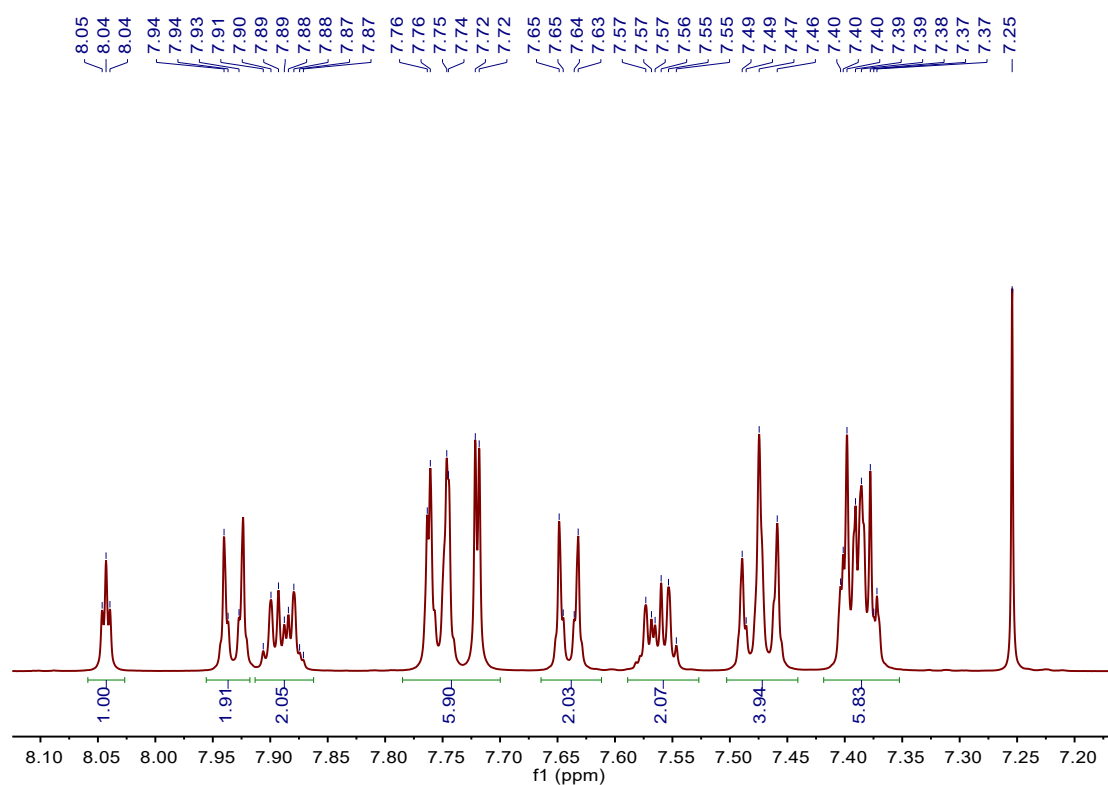

**Figure S1.**  $^1\text{H}$ -NMR Spectrum of MACN in  $\text{CDCl}_3$ .

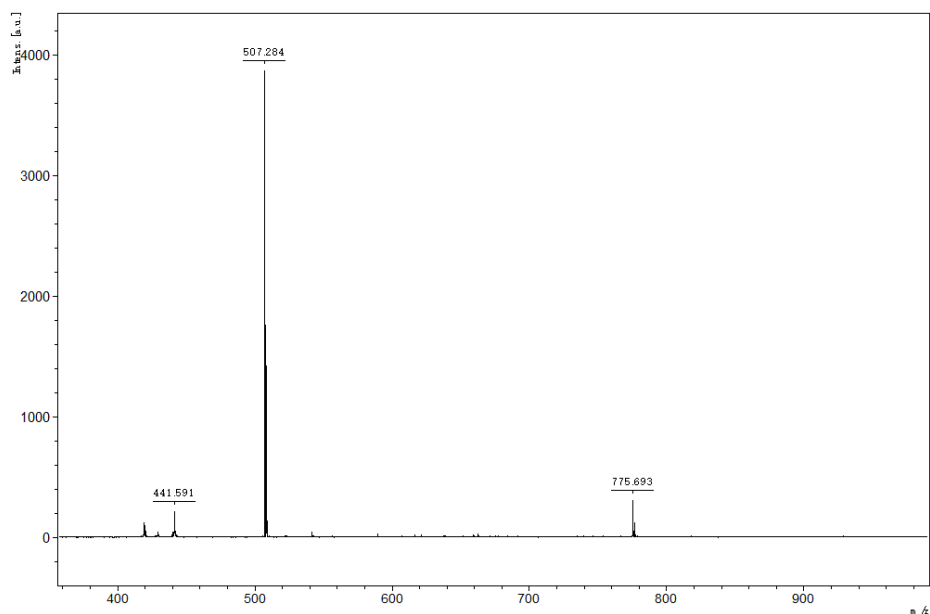

**Figure S2.** Mass Spectrum ( $M+H^+$ ) of MACN.

## S2. Supplementary Thermal and Electrochemical Properties

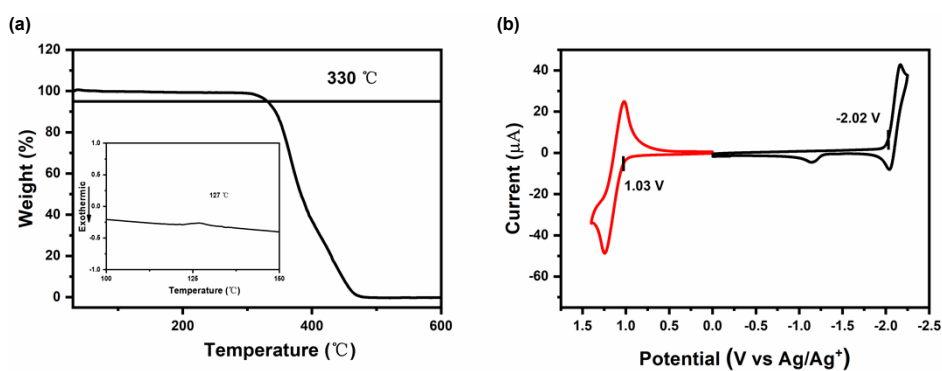

**Figure S3.** (a) TGA and DSC curves (inset) of MACN. (b) Electrochemical CV curves of MACN.

## S3. Supplementary Theoretical Calculations

|                       | Singlets |            |                       | Triplets |            |
|-----------------------|----------|------------|-----------------------|----------|------------|
|                       | Hole     | Particle   |                       | Hole     | Particle   |
| $S_0 \rightarrow S_1$ |          | 98.60%<br> | $S_0 \rightarrow T_1$ |          | 96.89%<br> |
| $S_0 \rightarrow S_2$ |          | 50.12%<br> | $S_0 \rightarrow T_2$ |          | 57.21%<br> |
| $S_0 \rightarrow S_3$ |          | 99.84%<br> | $S_0 \rightarrow T_3$ |          | 64.01%<br> |

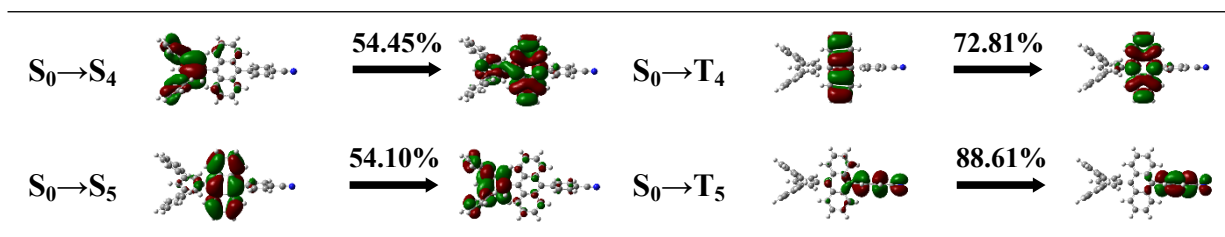

**Figure S4.** The NTO transition character of the first five singlet and triplet states.

## S4. Supplementary Photophysical Properties

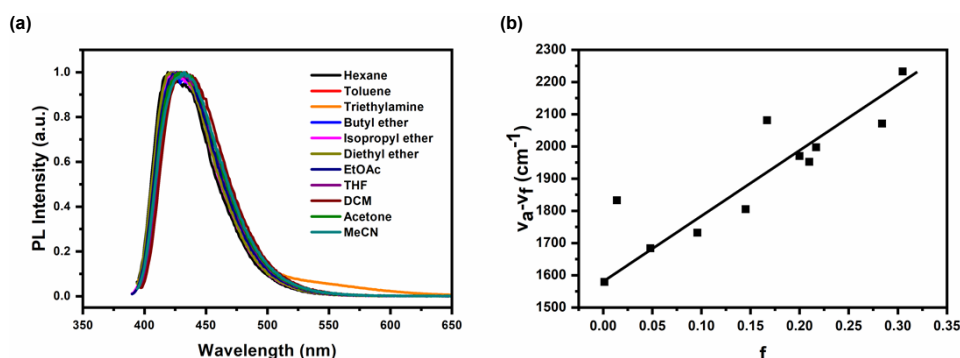

**Figure S5.** (a) PL spectra in different solvents; (b) Lippert–Mataga plots of the fluorescence maxima of MACN against the solvent polarity parameters

**Table S1.** Photophysical parameters of MACN

| MACN      | PLQY (%) | $\tau$ (ns) | $K_r/10^8(\text{S}^{-1})$ | $K_{nr}/10^8(\text{S}^{-1})$ |
|-----------|----------|-------------|---------------------------|------------------------------|
| THF       | 74.3     | 4.26        | 1.74                      | 0.61                         |
| Neat film | 38.2     | 1.04        | 3.67                      | 5.95                         |

## S5. Supplementary Electroluminescence Performances

To evaluate the transporting properties of this material, single-carrier devices were fabricated with structure of ITO/NPB (10 nm)/MACN (80nm)/NPB (10 nm)/Al for hole-only device and ITO/TPBi (10 nm)/MACN (80 nm)/TPBi (10 nm)/LiF /Al for electron-only device. NPB and TPBi are used to prevent electron and hole injection from the cathode and anode, respectively. As the voltage increased, the current becomes space-charge limited with a nearly quadratic dependence on voltage. The hole and electron mobilities were calculated from the slope of the  $J^{1/2}$ -V curves to be  $1.47 \times 10^{-12} \text{ cm}^2 \text{ V}^{-1} \text{ s}^{-1}$  and  $6.13 \times 10^{-7} \text{ cm}^2 \text{ V}^{-1} \text{ s}^{-1}$ , respectively, indicating that imbalance of carrier recombination may be the reason for limiting the EQE of devices based on MACN.

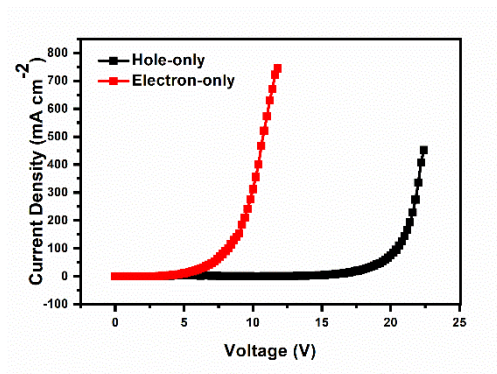

**Figure S6.** Current density versus voltage characteristics of the hole-only and electron-only devices.

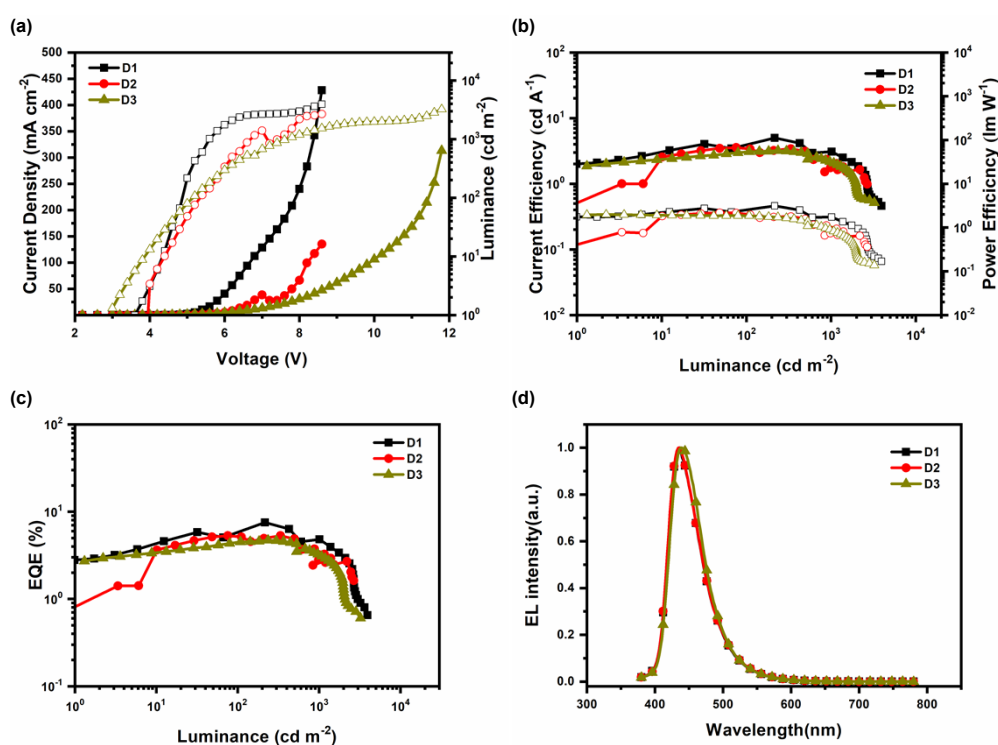

**Figure S7.** (a) J-V-L curves of the devices. (b) CE-L-PE characteristics. (c) L-EQE curves. (d) The EL spectra.

**Table S2.** Device performances of MACN OLEDs with different structures

| Device | V <sub>on</sub><br>(V) | L <sub>max</sub><br>(cd m <sup>-2</sup> ) | CE <sub>max</sub><br>(cd A <sup>-1</sup> ) | EQE <sub>max</sub><br>(%) | PE <sub>max</sub><br>(lm W <sup>-1</sup> ) | EL peak<br>(nm) | CIE<br>(x,y)  |
|--------|------------------------|-------------------------------------------|--------------------------------------------|---------------------------|--------------------------------------------|-----------------|---------------|
| A      | 3.8                    | 3942                                      | 4.99                                       | 7.51                      | 3.14                                       | 436             | (0.154,0.075) |
| B      | 4                      | 2682                                      | 3.56                                       | 5.31                      | 2.94                                       | 436             | (0.155,0.075) |
| C      | 3                      | 3236                                      | 3.21                                       | 4.71                      | 1.99                                       | 438             | (0.153,0.75)  |

Device A: ITO/ PEDOT: PSS (40 nm)/TCTA (40 nm)/MACN (20 nm)/ TPBi (30 nm)/LiF/Al

Device B: ITO/P PEDOT: PSS (40 nm)/TCTA (40 nm)/MACN (20 nm)/TmPyPb (30 nm)/LiF/Al

Device C: ITO/ PEDOT: PSS (40 nm) /TAPC (20 nm) /TCTA (30 nm)/MACN (20 nm)/TPBi (30 nm)/LiF/Al

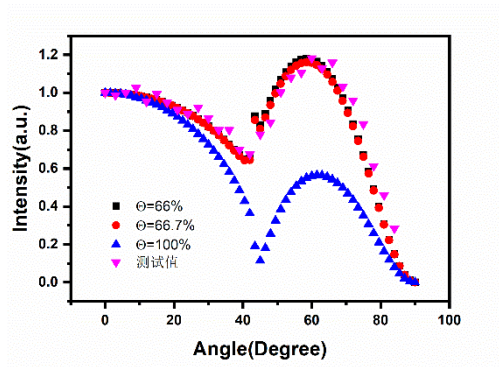

**Figure S8.** Variable-angle PL measurements of MACN film.  $\Theta$ , orientation factors. For fully horizontal dipoles,  $\Theta$  equals 100% and isotropic dipole orientation,  $\Theta$  equals 67%.

## S6. Supplementary Mechanism Study

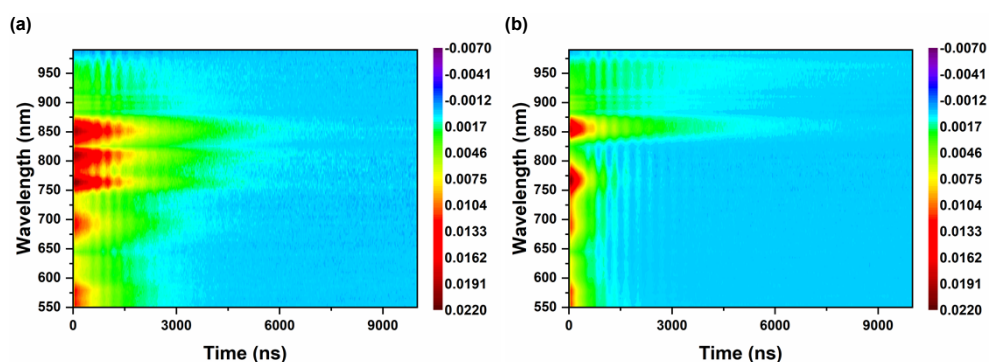

**Figure S9.** (a) Transient absorption spectra of the pristine PtOEP solution. (b) Transient absorption spectra of the MACN & PtOEP solution.

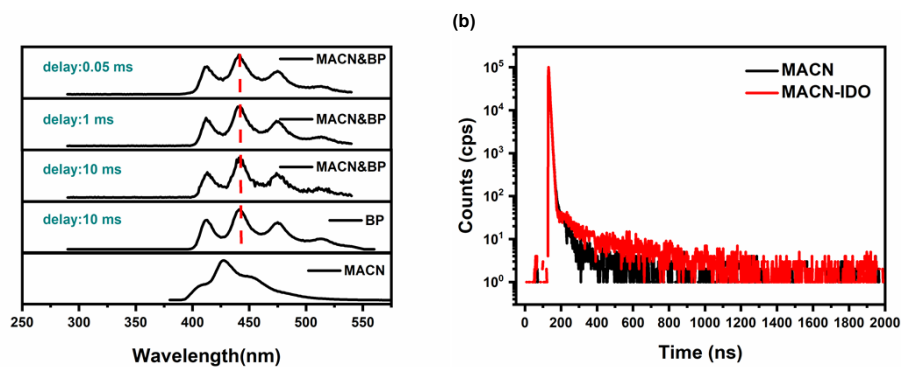

**Figure S10.** (a) Top: the delayed emission spectrum of the MACN & BP solution; middle: the phosphorescence spectrum of BP. The fluorescence spectrum of MACN at 77 K appears at the

bottom. In the mixed solution, the concentration of the ketones was  $10^{-5}$  M, and the concentration of MACN was  $10^{-4}$  M. The excitation wavelength was 280 nm. (b) The PL decay spectra of the MACN and MACN& IDO solutions at room temperature.
